# Supplementary material
Source: PubMed Central journal article supplement (PMC8805334)
Supplement: 13756_2022_1058_MOESM1_ESM.pdf [file 13756_2022_1058_MOESM1_ESM.pdf]

**Additional file 1.** Overall hygienic hand disinfection compliance by occupational group and medical specialty: results of two logistic regressions (surgery, anesthesia).

| VARIABLES                 |                           | SURGERY |                            |                                     | ANESTHESIA |                            |                                    |
|---------------------------|---------------------------|---------|----------------------------|-------------------------------------|------------|----------------------------|------------------------------------|
|                           |                           | N       | OR<br>(crude)              | 95%-CI<br>(crude)                   | N          | OR<br>(crude)              | 95%-CI<br>(crude)                  |
| <b>Occupational group</b> | Physicians                | 184     | Ref.                       |                                     | 374        | Ref.                       |                                    |
|                           | Nurses                    | 158     | <b>2.8</b><br><b>(2.6)</b> | <b>0.6-13.9</b><br><b>(1.6-4.2)</b> | 429        | 0.8<br>(0.9)               | 0.6-1.0<br>(0.7-1.2)               |
| <b>Sex</b>                | Men                       | 165     | Ref.                       |                                     | 436        | Ref.                       |                                    |
|                           | Women                     | 177     | 0.5<br><b>(2.1)</b>        | 0.1-2.2<br><b>(1.3-3.5)</b>         | 367        | 0.9<br>(1.1)               | 0.7-1.3<br>(0.8-1.4)               |
| <b>Location</b>           | Inside operation theatre  | 211     | Ref.                       |                                     | 252        | Ref.                       |                                    |
|                           | Outside operation theatre | 131     | <b>0.3</b><br><b>(0.3)</b> | <b>0.2-0.7</b><br><b>(0.2-0.5)</b>  | 551        | <b>1.6</b><br><b>(1.4)</b> | <b>1.1-2.2</b><br><b>(1.1-1.9)</b> |
| <b>Operation theatres</b> | Adults                    | 262     | Ref.                       |                                     | 605        | Ref.                       |                                    |
|                           | Pediatric                 | 80      | <b>2.2</b><br><b>(1.8)</b> | <b>1.2-3.8</b><br><b>(1.0-3.0)</b>  | 198        | <b>1.9</b><br><b>(1.8)</b> | <b>1.3-2.6</b><br><b>(1.3-2.5)</b> |

Note: OR: odds ratio, 95%-CI: 95% confidence interval, Ref.: reference; significant results ( $p < 0.05$ ) are displayed in bold.
