# Supplementary material
Source: PubMed Central journal article supplement (PMC8805334)
Supplement: 13756_2022_1058_MOESM2_ESM.pdf [file 13756_2022_1058_MOESM2_ESM.pdf]

**Additional file 2. A-E:** Hygienic hand disinfection compliance by occupational group and medical specialty, stratified according to WHO-5.

**A. Before patient contact (n=190)**

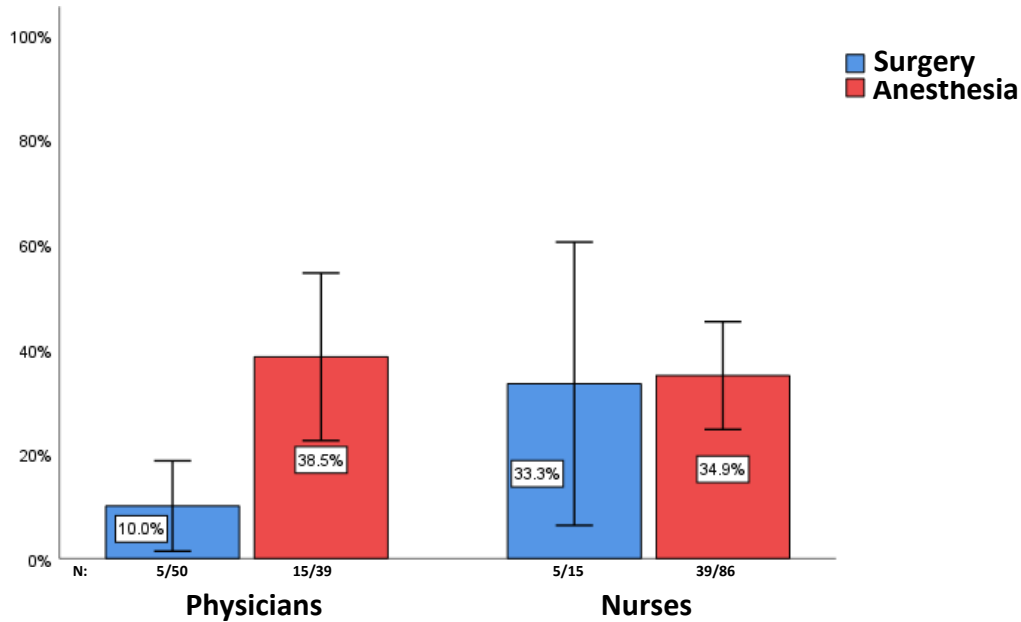

Note: 95% confidence intervals are shown.

**B. Before aseptic task (n=277)**

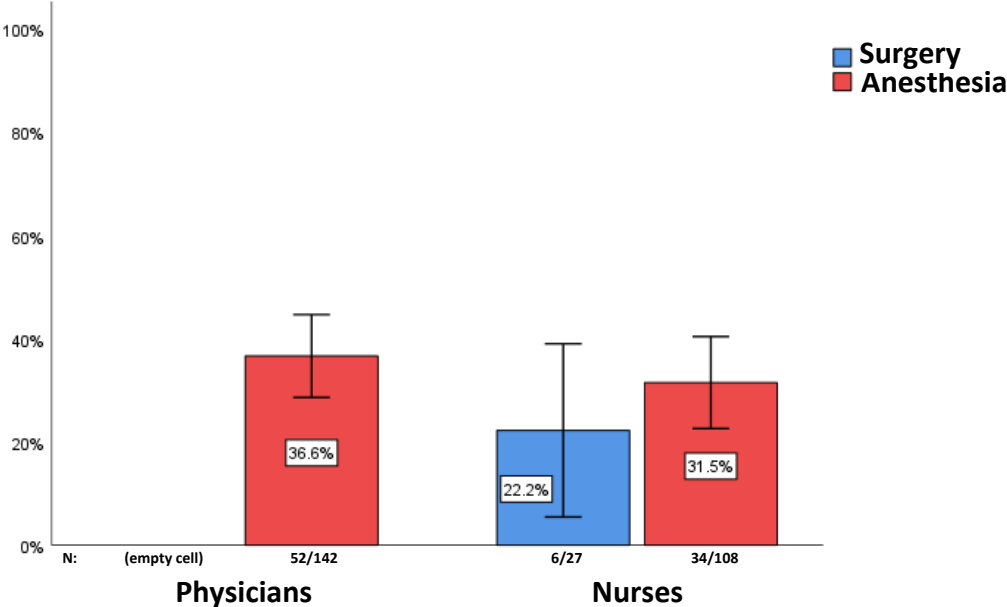

Note: 95% confidence intervals are shown.

C. After body fluid exposure (n=198)

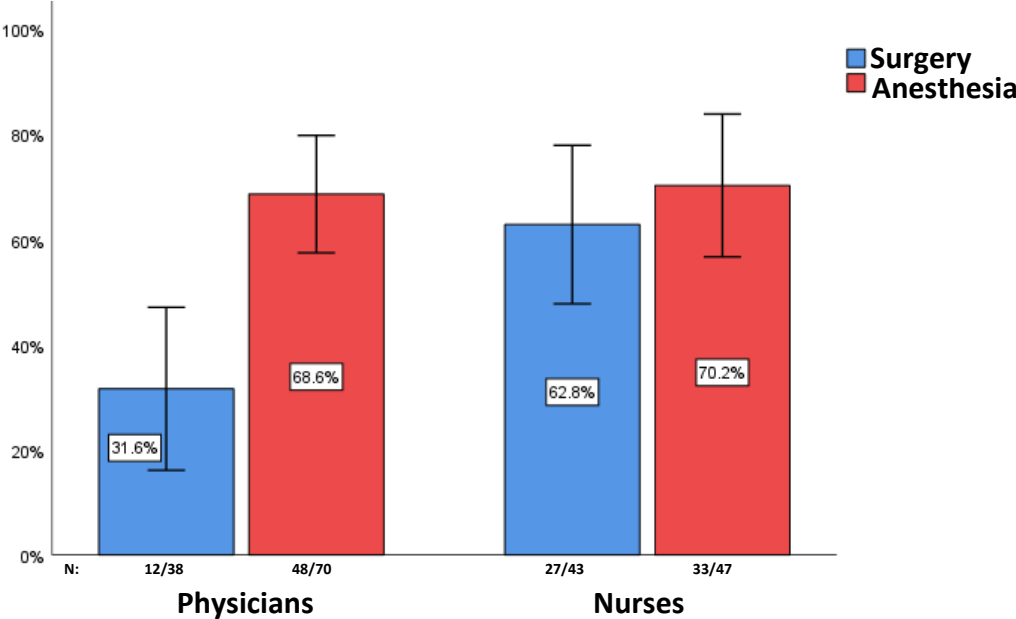

Note: 95% confidence intervals are shown.

D. After patient contact (n=221)

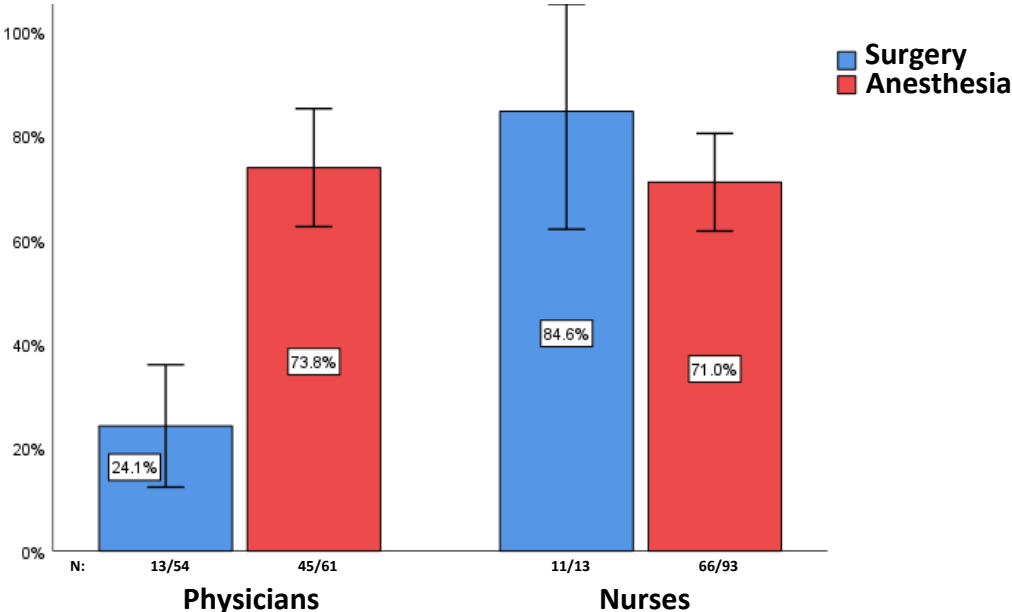

Note: 95% confidence intervals are shown.

E. After contact with patient surroundings (n=259)

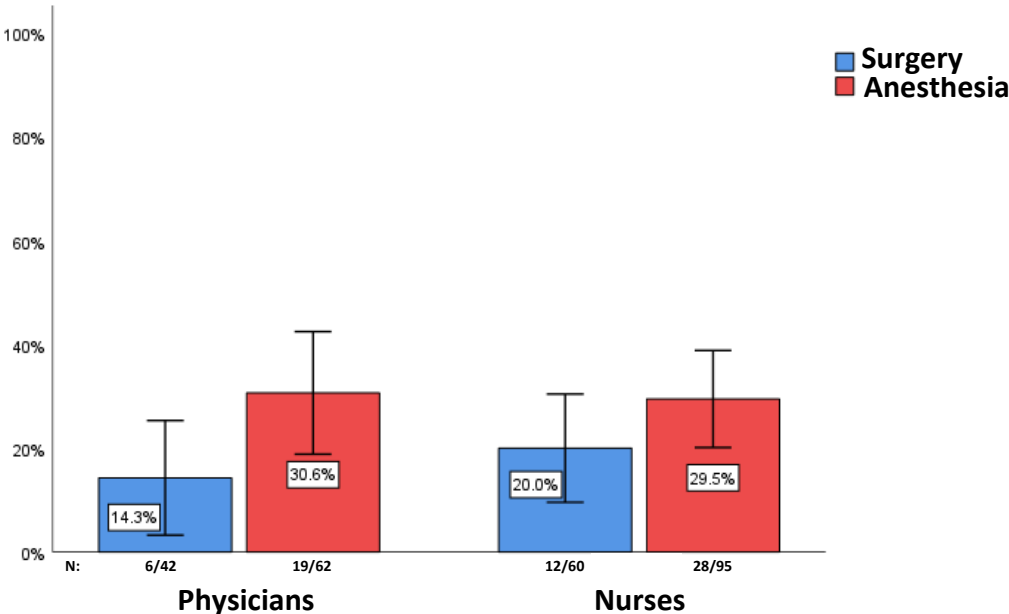

Note: 95% confidence intervals are shown.
