# Supplementary material
Source: PubMed Central journal article supplement (PMC8805334)
Supplement: 13756_2022_1058_MOESM3_ESM.pdf [file 13756_2022_1058_MOESM3_ESM.pdf]

**Additional file 3. A-E:** Hygienic hand disinfection compliance by occupational group and medical specialty, stratified according to WHO-5: results of three logistic regressions (total, physicians, nurses).

**A. Before patient contact** (n=190)

| VARIABLES                                                 |                           | TOTAL             |                     |                             | PHYSICIANS |                            |                                      | NURSES |                            |                                    |
|-----------------------------------------------------------|---------------------------|-------------------|---------------------|-----------------------------|------------|----------------------------|--------------------------------------|--------|----------------------------|------------------------------------|
|                                                           |                           | N (opportunities) | Wald                | p                           |            |                            |                                      |        |                            |                                    |
| <b>Interaction Occupational Group x Medical Specialty</b> |                           | 190               | <b>6.39</b>         | <b>p = 0.012</b>            |            |                            |                                      |        |                            |                                    |
|                                                           |                           | N (opportunities) | OR (crude)          | 95%-CI (crude)              | N          | OR (crude)                 | 95%-CI (crude)                       | N      | OR (crude)                 | 95%-CI (crude)                     |
| <b>Occupational group</b>                                 | Physicians                | 89                | Ref.                |                             |            |                            |                                      |        |                            |                                    |
|                                                           | Nurses                    | 101               | <b>2.9</b><br>(1.8) | <b>1.1-7.7</b><br>(1.0-3.5) |            |                            |                                      |        |                            |                                    |
| <b>Medical specialty</b>                                  | Surgery                   | 65                | Ref.                |                             | 50         | Ref.                       |                                      | 15     | Ref.                       |                                    |
|                                                           | Anesthesia                | 125               | 2.1<br><b>(3.1)</b> | 0.9-5.0<br><b>(1.4-6.7)</b> | 39         | <b>5.9</b><br><b>(5.6)</b> | <b>1.8-19.3</b><br><b>(1.8-17.4)</b> | 86     | 0.4<br>(1.1)               | 0.1-1.9<br>(0.3-3.4)               |
| <b>Sex</b>                                                | Men                       | 114               | Ref.                |                             | 74         | Ref.                       |                                      | 40     | Ref.                       |                                    |
|                                                           | Women                     | 76                | 0.7<br>(1.0)        | 0.3-1.5<br>(0.5-1.9)        | 15         | 0.8<br>(1.3)               | 0.2-3.4<br>(0.4-4.7)                 | 61     | 0.7<br>(0.6)               | 0.3-1.8<br>(0.2-1.3)               |
| <b>Location</b>                                           | Inside operation theatre  | 54                | Ref.                |                             | 21         | Ref.                       |                                      | 33     | Ref.                       |                                    |
|                                                           | Outside operation theatre | 136               | 1.7<br>(1.2)        | 0.8-4.0<br>(0.6-2.5)        | 68         | 0.9<br>(0.6)               | 0.3-3.2<br>(0.2-2.0)                 | 68     | 3.3<br>(2.1)               | 1.0-11.5<br>(0.8-5.2)              |
| <b>Operation theatres</b>                                 | Adults                    | 145               | Ref.                |                             | 67         | Ref.                       |                                      | 78     | Ref.                       |                                    |
|                                                           | Pediatric                 | 45                | 0.4<br>(0.5)        | 0.2-1.1<br>(0.2-1.0)        | 22         | 1.0<br>(1.0)               | 0.3-3.7<br>(0.3-3.2)                 | 23     | <b>0.2</b><br><b>(0.2)</b> | <b>0.1-0.7</b><br><b>(0.1-0.8)</b> |

Note: OR: odds ratio, 95%-CI: 95% confidence interval, Ref.: reference; significant results (p<0.05) are displayed in bold.

Additional file to: Claas Baier, Maren Tinne, Thomas von Lengerke, Frank Gossé, Ella Ebadi. Compliance with hand disinfection in the surgical area of an orthopedic university clinic: results of an observational study. DOI: 10.1186/s13756-022-01058-2

**B. Before aseptic task (n=277)\***

| VARIABLES                 |                           | TOTAL             |                     |                             |
|---------------------------|---------------------------|-------------------|---------------------|-----------------------------|
|                           |                           | N (opportunities) | OR<br>(crude)       | 95%-CI<br>(crude)           |
| <b>Occupational group</b> | Physicians                | 142               | Ref.                |                             |
|                           | Nurses                    | 135               | <b>0.4</b><br>(0.7) | <b>0.2-0.7</b><br>(0.4-1.2) |
| <b>Medical specialty</b>  | Surgery                   | 27                | Ref.                |                             |
|                           | Anesthesia                | 250               | 0.4<br>(1.8)        | 0.1-1.4<br>(0.7-4.7)        |
| <b>Sex</b>                | Men                       | 144               | Ref.                |                             |
|                           | Women                     | 133               | 1.2<br>(1.1)        | 0.6-2.3<br>(0.7-1.9)        |
| <b>Location</b>           | Inside operation theatre  | 117               | Ref.                |                             |
|                           | Outside operation theatre | 160               | <b>4.2</b><br>(2.5) | <b>2.1-8.5</b><br>(1.4-4.2) |
| <b>Operation theatres</b> | Adults                    | 217               | Ref.                |                             |
|                           | Pediatric                 | 60                | <b>2.1</b><br>(2.1) | <b>1.1-4.2</b><br>(1.2-3.8) |

Note: OR: odds ratio, 95%-CI: 95% confidence interval, Ref.: reference; significant results ( $p < 0.05$ ) are displayed in bold. \*No separate logistic regressions for the subgroups nurses and physicians due to no observed hand hygiene opportunities before aseptic procedures among surgeons.

C. After body fluid exposure (n=198)

| VARIABLES                                                 |                           | TOTAL             |                            |                                     | PHYSICIANS |                            |                                      | NURSES |              |                       |
|-----------------------------------------------------------|---------------------------|-------------------|----------------------------|-------------------------------------|------------|----------------------------|--------------------------------------|--------|--------------|-----------------------|
|                                                           |                           | N (opportunities) | Wald                       | p                                   |            |                            |                                      |        |              |                       |
| <b>Interaction Occupational Group x Medical Specialty</b> |                           | 198               | <b>5.55</b>                | <b>p = 0.018</b>                    |            |                            |                                      |        |              |                       |
|                                                           |                           | N (opportunities) | OR (crude)                 | 95%-CI (crude)                      | N          | OR (crude)                 | 95%-CI (crude)                       | N      | OR (crude)   | 95%-CI (crude)        |
| <b>Occupational group</b>                                 | Physicians                | 108               | Ref.                       |                                     |            |                            |                                      |        |              |                       |
|                                                           | Nurses                    | 90                | <b>2.6</b><br>(1.6)        | <b>1.1-6.1</b><br>(0.9-2.9)         |            |                            |                                      |        |              |                       |
| <b>Medical specialty</b>                                  | Surgery                   | 81                | Ref.                       |                                     | 38         | Ref.                       |                                      | 43     | Ref.         |                       |
|                                                           | Anesthesia                | 117               | <b>2.5</b><br><b>(2.4)</b> | <b>0.9-6.9</b><br><b>(1.3-4.4)</b>  | 70         | <b>7.2</b><br><b>(4.7)</b> | <b>2.0-25.6</b><br><b>(2.0-11.1)</b> | 47     | 1.3<br>(1.4) | 0.1-16.6<br>(0.6-3.4) |
| <b>Sex</b>                                                | Men                       | 101               | Ref.                       |                                     | 83         | Ref.                       |                                      | 18     | Ref.         |                       |
|                                                           | Women                     | 97                | 0.8<br>(1.6)               | 0.3-1.8<br>(0.9-2.8)                | 25         | 0.5<br>(1.6)               | 0.2-1.6<br>(0.6-4.0)                 | 72     | 1.2<br>(1.0) | 0.3-4.3<br>(0.3-3.0)  |
| <b>Location</b>                                           | Inside operation theatre  | 105               | Ref.                       |                                     | 59         | Ref.                       |                                      | 46     | Ref.         |                       |
|                                                           | Outside operation theatre | 93                | 1.0<br><b>(1.9)</b>        | 0.4-2.7<br><b>(1.1-3.5)</b>         | 49         | 1.0<br><b>(2.4)</b>        | 0.3-3.0<br><b>(1.1-5.4)</b>          | 44     | 1.0<br>(1.4) | 0.1-12.7<br>(0.6-3.4) |
| <b>Operation theatres</b>                                 | Adults                    | 150               | Ref.                       |                                     | 81         | Ref.                       |                                      | 69     | Ref.         |                       |
|                                                           | Pediatric                 | 48                | <b>3.1</b><br><b>(2.4)</b> | <b>1.3 -7.0</b><br><b>(1.1-4.9)</b> | 27         | <b>5.3</b><br><b>(3.0)</b> | <b>1.7-16.8</b><br><b>(1.1-7.7)</b>  | 21     | 1.7<br>(1.8) | 0.5-5.4<br>(0.6-5.6)  |

Note: OR: odds ratio, 95%-CI: 95% confidence interval, Ref.: reference; significant results (p<0.05) are displayed in bold.

D. After patient contact (n=221)

| VARIABLES                                                 |                           | TOTAL             |                            |                                    | PHYSICIANS |                            |                                      | NURSES |                     |                             |
|-----------------------------------------------------------|---------------------------|-------------------|----------------------------|------------------------------------|------------|----------------------------|--------------------------------------|--------|---------------------|-----------------------------|
|                                                           |                           | N (opportunities) | Wald                       | p                                  |            |                            |                                      |        |                     |                             |
| <b>Interaction Occupational Group x Medical Specialty</b> |                           | 221               | <b>5.21</b>                | <b>p = 0.022</b>                   |            |                            |                                      |        |                     |                             |
|                                                           |                           | N (opportunities) | OR (crude)                 | 95%-CI (crude)                     | N          | OR (crude)                 | 95%-CI (crude)                       | N      | OR (crude)          | 95%-CI (crude)              |
| <b>Occupational group</b>                                 | Physicians                | 115               | Ref.                       |                                    |            |                            |                                      |        |                     |                             |
|                                                           | Nurses                    | 106               | 2.8<br><b>(2.6)</b>        | 1.0-8.2<br><b>(1.5-4.6)</b>        |            |                            |                                      |        |                     |                             |
| <b>Medical specialty</b>                                  | Surgery                   | 67                | Ref.                       |                                    | 54         | Ref.                       |                                      | 13     | Ref.                |                             |
|                                                           | Anesthesia                | 154               | <b>2.9</b><br><b>(4.6)</b> | <b>1.1-7.5</b><br><b>(2.5-8.5)</b> | 61         | <b>8.7</b><br><b>(8.9)</b> | <b>3.3-23.0</b><br><b>(3.8-20.7)</b> | 93     | 0.8<br><b>(0.4)</b> | 0.1-4.9<br><b>(0.1-2.1)</b> |
| <b>Sex</b>                                                | Men                       | 129               | Ref.                       |                                    | 90         | Ref.                       |                                      | 39     | Ref.                |                             |
|                                                           | Women                     | 92                | 0.8<br><b>(2.2)</b>        | 0.4-1.8<br><b>(1.2-3.9)</b>        | 25         | 1.1<br><b>(3.2)</b>        | 0.3-3.7<br><b>(1.2-8.5)</b>          | 67     | 0.7<br><b>(0.9)</b> | 0.3-1.8<br><b>(0.4-2.1)</b> |
| <b>Location</b>                                           | Inside operation theatre  | 71                | Ref.                       |                                    | 29         | Ref.                       |                                      | 42     | Ref.                |                             |
|                                                           | Outside operation theatre | 150               | <b>0.3</b><br><b>(0.3)</b> | <b>0.1-0.7</b><br><b>(0.1-0.5)</b> | 86         | <b>0.3</b><br><b>(0.2)</b> | <b>0.1-0.9</b><br><b>(0.1-0.6)</b>   | 64     | 0.3<br><b>(0.4)</b> | 0.1-1.0<br><b>(0.1-1.0)</b> |
| <b>Operation theatres</b>                                 | Adults                    | 161               | Ref.                       |                                    | 85         | Ref.                       |                                      | 76     | Ref.                |                             |
|                                                           | Pediatric                 | 60                | <b>3.2</b><br><b>(2.1)</b> | <b>1.5-7.1</b><br><b>(1.1-4.1)</b> | 30         | <b>3.3</b><br>2.0          | <b>1.1-10.2</b><br><b>(0.9-4.8)</b>  | 30     | 3.0<br><b>(2.3)</b> | 1.0-9.3<br><b>(0.8-6.8)</b> |

Note: OR: odds ratio, 95%-CI: 95% confidence interval, Ref.: reference; significant results (p<0.05) are displayed in bold.

E. After contact with patient surroundings (n=259)

| VARIABLES                                                 |                           | TOTAL             |                            |                                    | PHYSICIANS |                            |                                      | NURSES |              |                      |
|-----------------------------------------------------------|---------------------------|-------------------|----------------------------|------------------------------------|------------|----------------------------|--------------------------------------|--------|--------------|----------------------|
|                                                           |                           | N (opportunities) | Wald                       | p                                  |            |                            |                                      |        |              |                      |
| <b>Interaction Occupational Group x Medical Specialty</b> |                           | 259               | 1.93                       | p = 0.165                          |            |                            |                                      |        |              |                      |
|                                                           |                           | N (opportunities) | OR (crude)                 | 95%-CI (crude)                     | N          | OR (crude)                 | 95%-CI (crude)                       | N      | OR (crude)   | 95%-CI (crude)       |
| <b>Occupational group</b>                                 | Physicians                | 104               | Ref.                       |                                    |            |                            |                                      |        |              |                      |
|                                                           | Nurses                    | 155               | 1.5<br>(1.1)               | 0.7-3.2<br>(0.6-2.0)               |            |                            |                                      |        |              |                      |
| <b>Medical specialty</b>                                  | Surgery                   | 102               | Ref.                       |                                    | 42         | Ref.                       |                                      | 60     | Ref.         |                      |
|                                                           | Anesthesia                | 157               | <b>2.1</b><br><b>(2.0)</b> | <b>1.1-4.2</b><br><b>(1.1-3.7)</b> | 62         | <b>9.7</b><br><b>(2.7)</b> | <b>2.4-40.0</b><br><b>(1.0-7.3)</b>  | 95     | 2.2<br>(1.7) | 0.6-7.9<br>(0.8-3.6) |
| <b>Sex</b>                                                | Men                       | 113               | Ref.                       |                                    | 76         | Ref.                       |                                      | 37     | Ref.         |                      |
|                                                           | Women                     | 146               | 0.9<br>(1.0)               | 0.4-1.8<br>(0.6-1.8)               | 28         | 1.9<br>(1.8)               | 0.6-6.4<br>(0.7-4.7)                 | 118    | 0.7<br>(0.6) | 0.3-1.7<br>(0.3-1.5) |
| <b>Location</b>                                           | Inside operation theatre  | 116               | Ref.                       |                                    | 40         | Ref.                       |                                      | 76     | Ref.         |                      |
|                                                           | Outside operation theatre | 143               | 1.7<br>(1.3)               | 0.7-3.9<br>(0.7-2.3)               | 64         | <b>7.0</b><br><b>(1.4)</b> | <b>1.7-28.5</b><br><b>(0.6-3.8)</b>  | 79     | 0.7<br>(1.2) | 0.2-1.9<br>(0.6-2.6) |
| <b>Operation theatres</b>                                 | Adults                    | 194               | Ref.                       |                                    | 77         | Ref.                       |                                      | 117    | Ref.         |                      |
|                                                           | Pediatric                 | 65                | <b>3.3</b><br><b>(2.9)</b> | <b>1.7-6.2</b><br><b>(1.6-5.4)</b> | 27         | <b>8.2</b><br><b>(5.0)</b> | <b>2.5-26.8</b><br><b>(1.9-13.3)</b> | 38     | 2.3<br>(2.0) | 1.0-5.3<br>(0.9-4.5) |

Note: OR: odds ratio, 95%-CI: 95% confidence interval, Ref.: reference; significant results (p<0.05) are displayed in bold.
